# Supplementary material for: Discovery and Exploration of Protein Kinase CK2 Binding Sites Using CK2α′Cys336Ser as an Exquisite Crystallographic Tool
Source: MDPI journal article supplement (doi:10.3390/kinasesphosphatases1040018), 2023-11-25
Supplement: s1 [file s1]

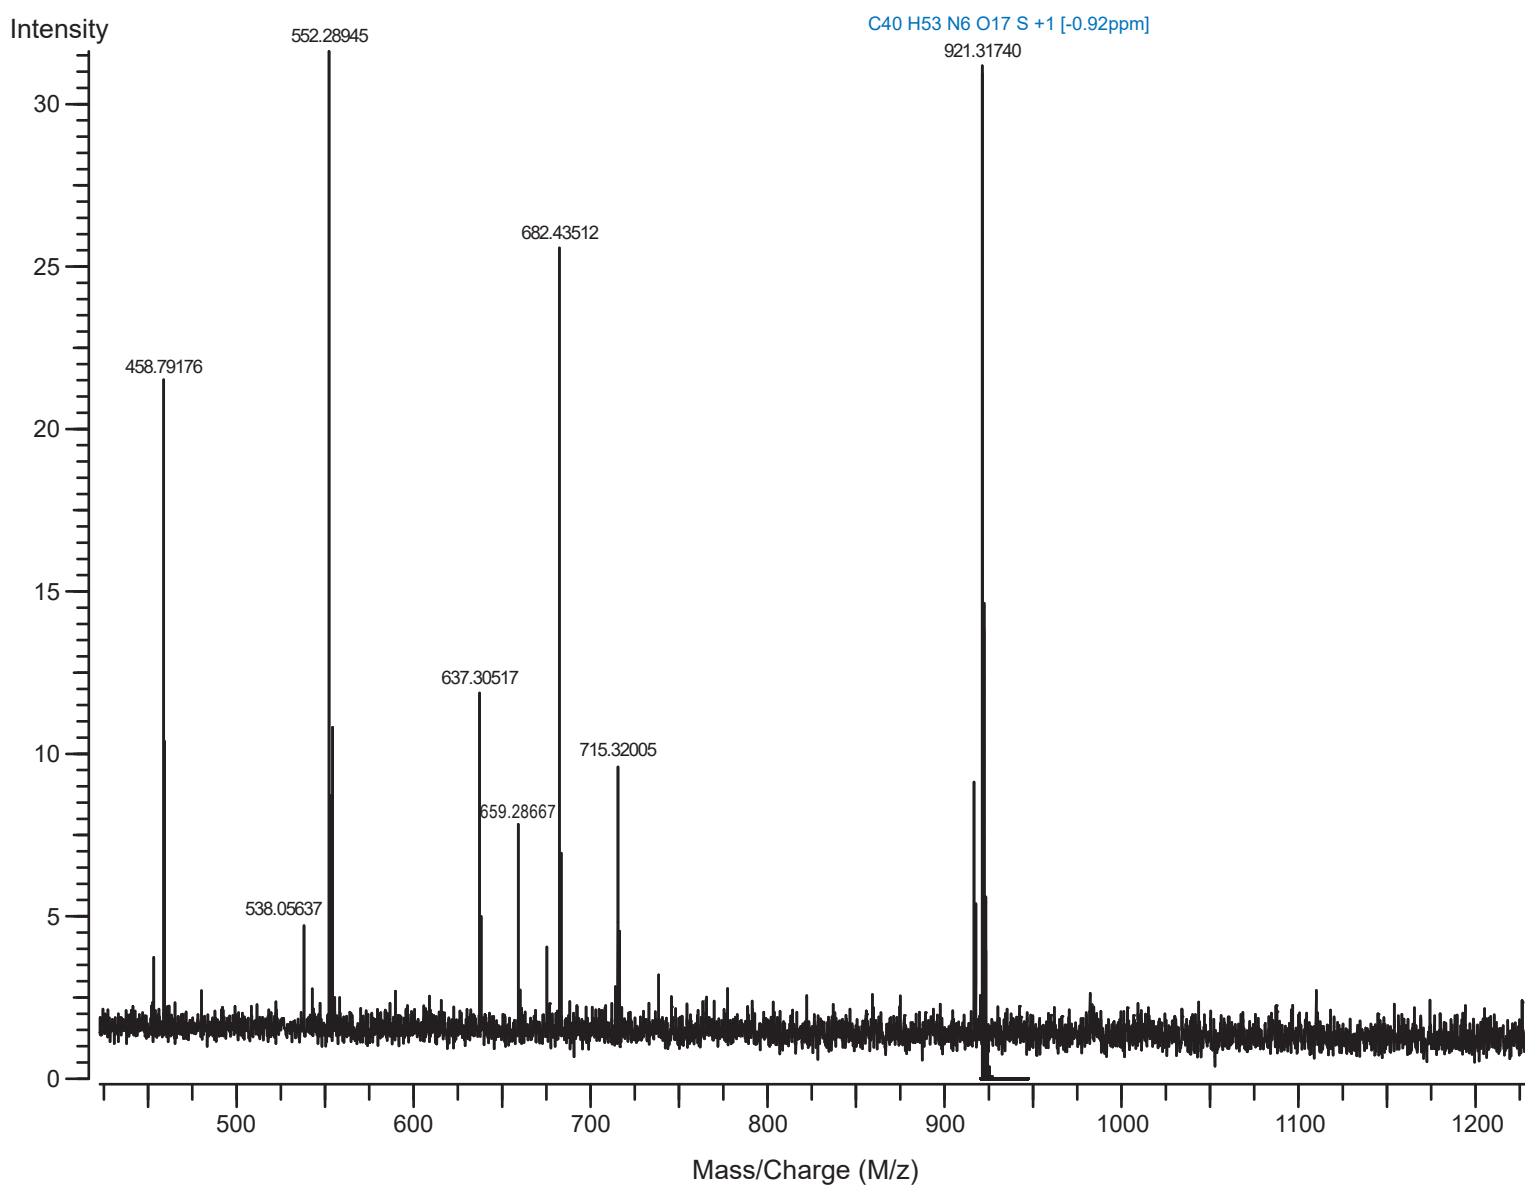

**Figure S2.** High-resolution mass spectrum (HRMS) of purified ARC-780.

The HRMS was obtained with combined Varian 910-FT-ICR and Varian J-320 3Q spectrometers in ESI positive ion mode. The peaks with smaller M/z correspond to an in-house calibration mixture.
