# Supplementary figures and images for: Discovery and Exploration of Protein Kinase CK2 Binding Sites Using CK2α′Cys336Ser as an Exquisite Crystallographic Tool
Source: MDPI journal article supplement (doi:10.3390/kinasesphosphatases1040018), 2023-11-25

mAU

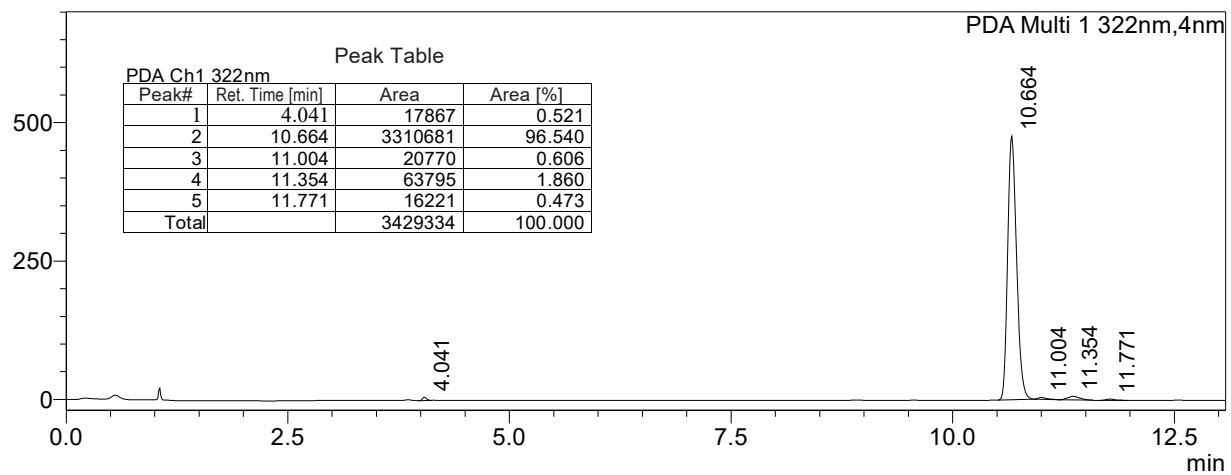

Figure S1. RP-HPLC purification of ARC-780.

Supplement: s1 [file s1]
